# Supplementary material
Source: MDPI journal article supplement (https://www.mdpi.com/2073-4352/13/6/934)
Supplement: s1 [file s1]

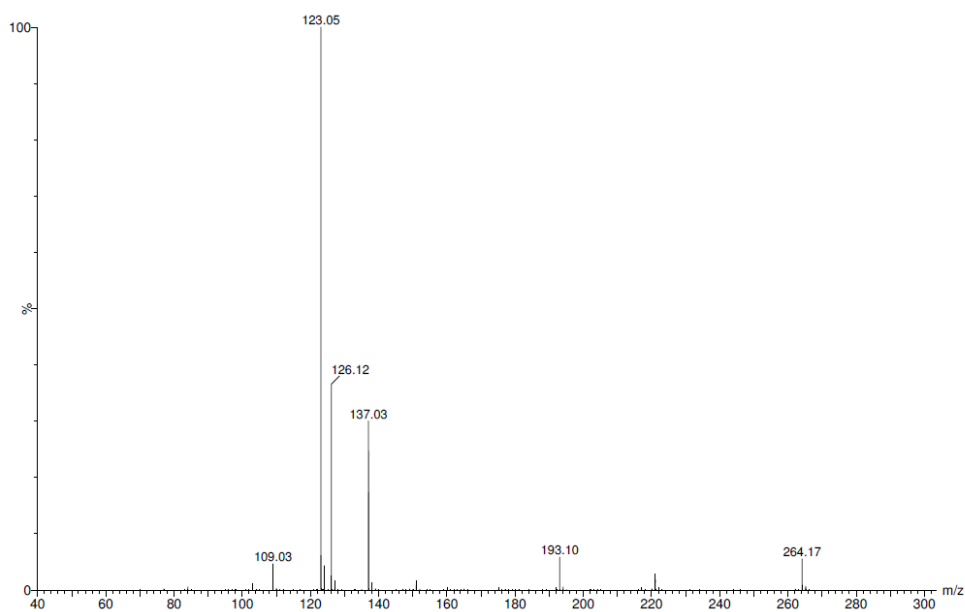

**Figure S1** ESI-MS/MS spectrum of compound **1** (4F-3Me- $\alpha$ -PVP)

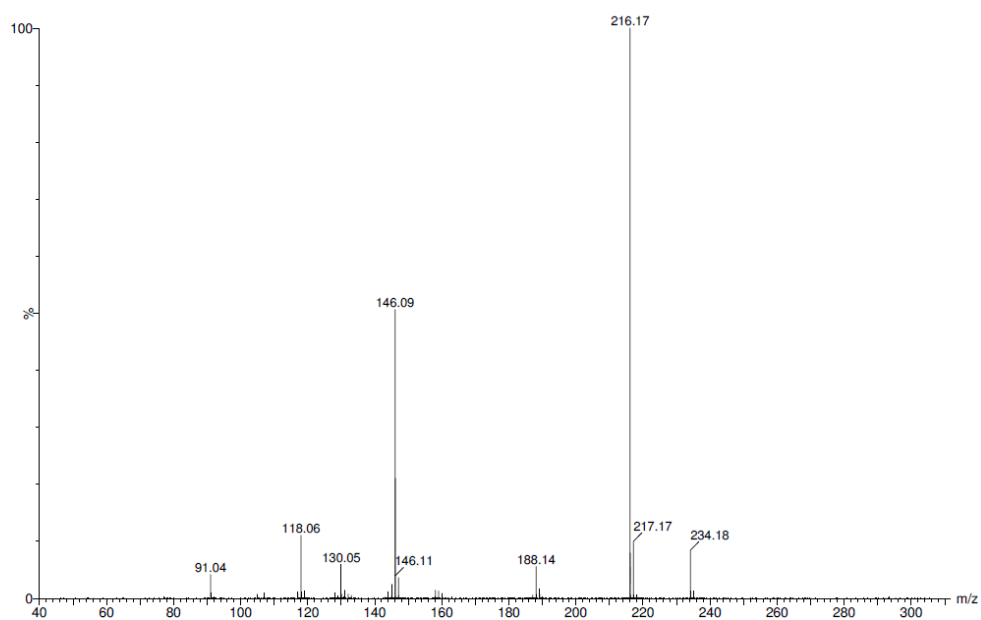

**Figure S2** ESI-MS/MS spectrum of compound **2** (N-ethylheptedrone)

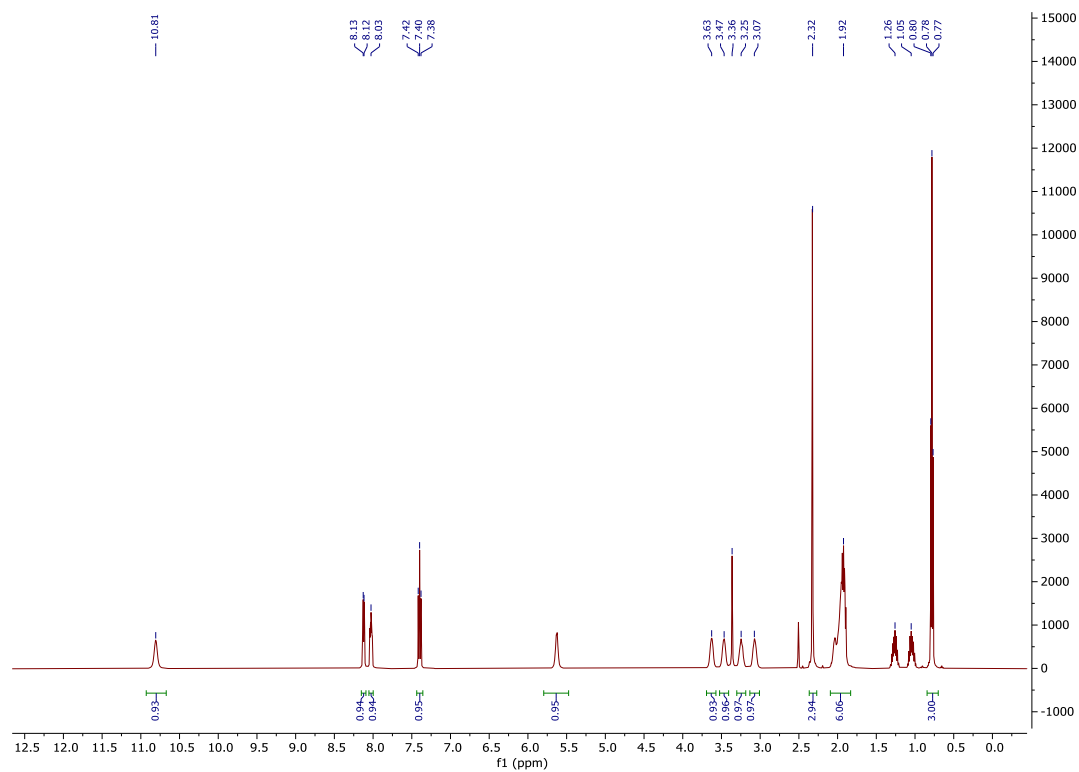

**Figure S3** <sup>1</sup>H nuclear magnetic resonance spectrum of compound **1** (4F-3Me- $\alpha$ -PVP)

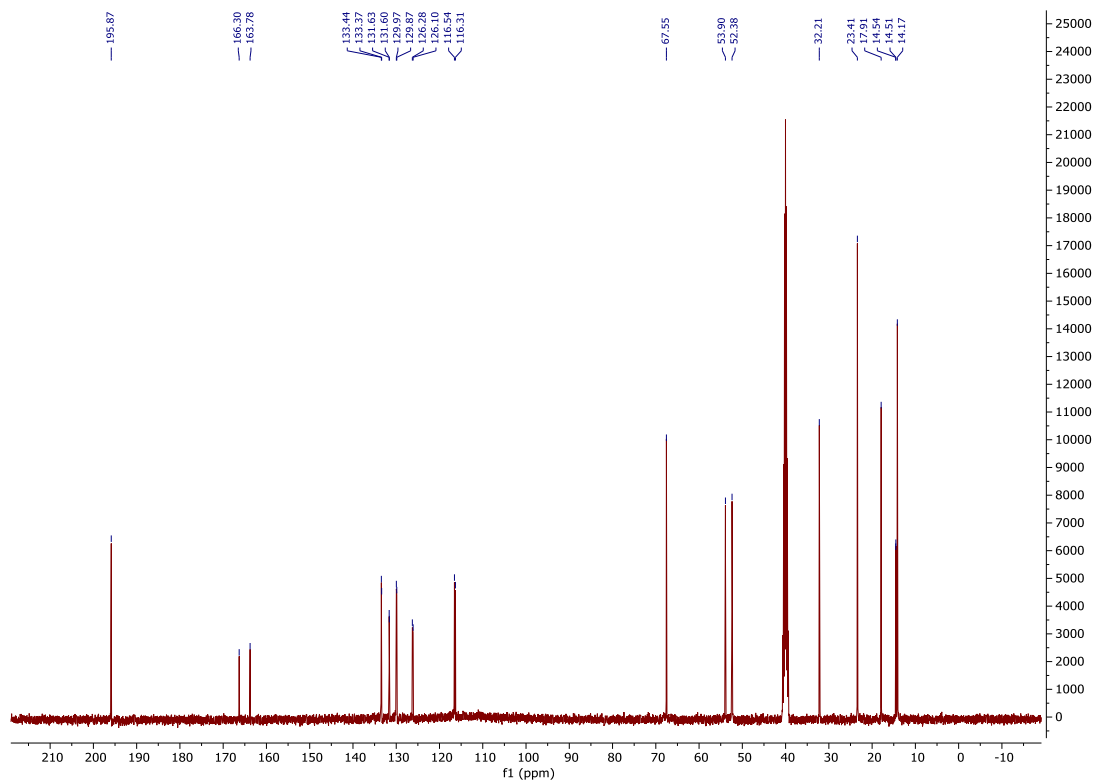

**Figure S4** <sup>13</sup>C nuclear magnetic resonance spectrum of compound **1** (4F-3Me- $\alpha$ -PVP)

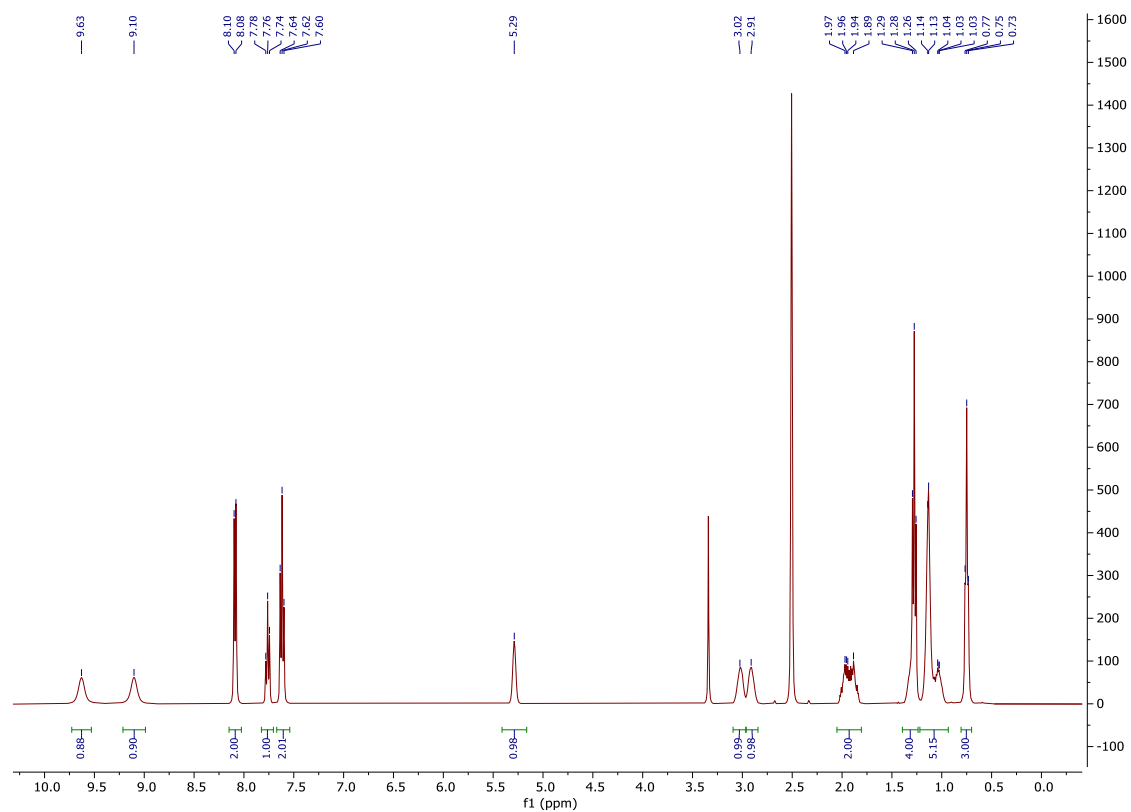

**Figure S5** <sup>1</sup>H nuclear magnetic resonance spectrum of compound **2** (N-ethylheptedrone)

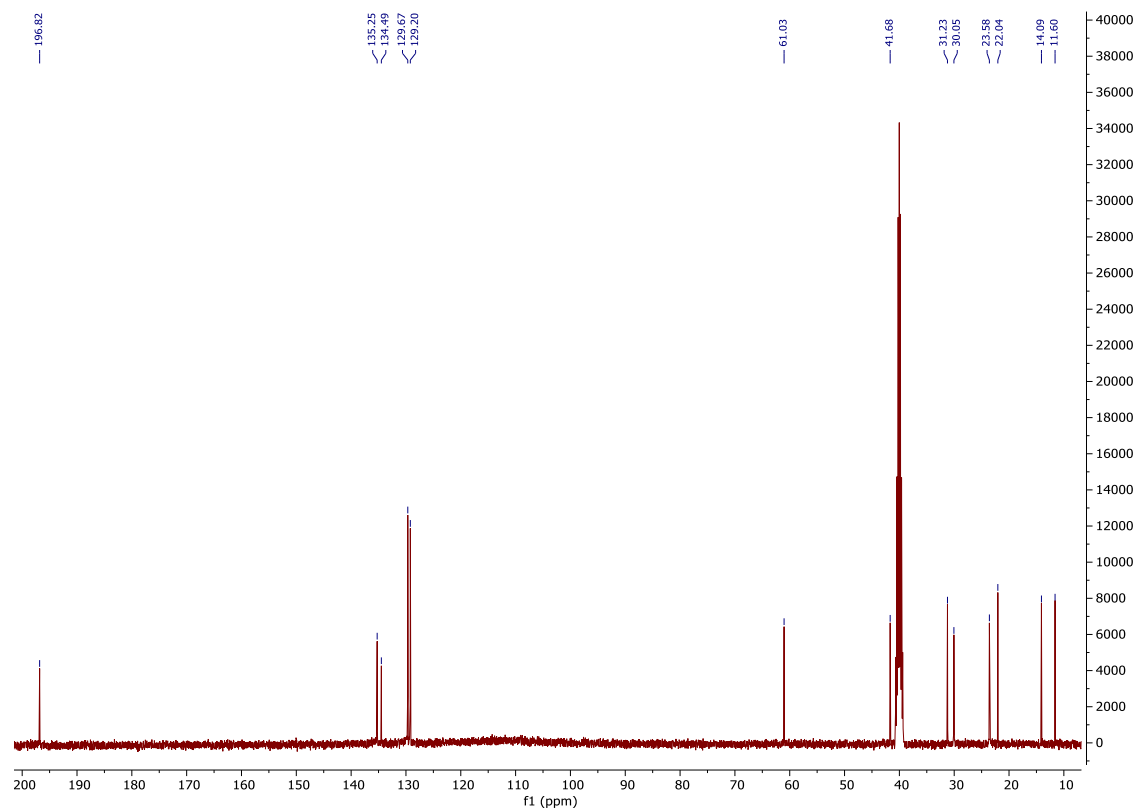

**Figure S6** <sup>13</sup>C nuclear magnetic resonance spectrum of compound **2** (N-ethylheptedrone)

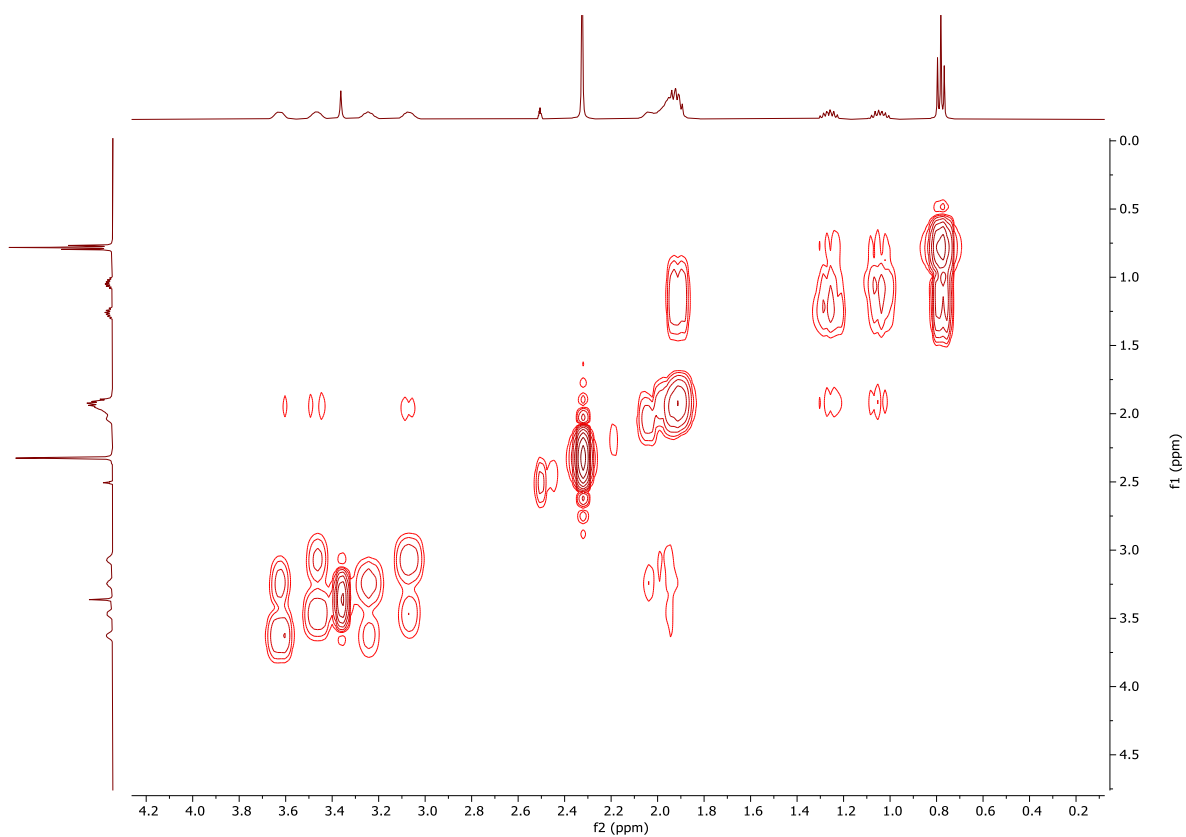

**Figure S7**  $^1\text{H}$ - $^1\text{H}$  COSY nuclear magnetic resonance spectrum of compound **1** (4F-3Me- $\alpha$ -PVP) – aliphatic fragment

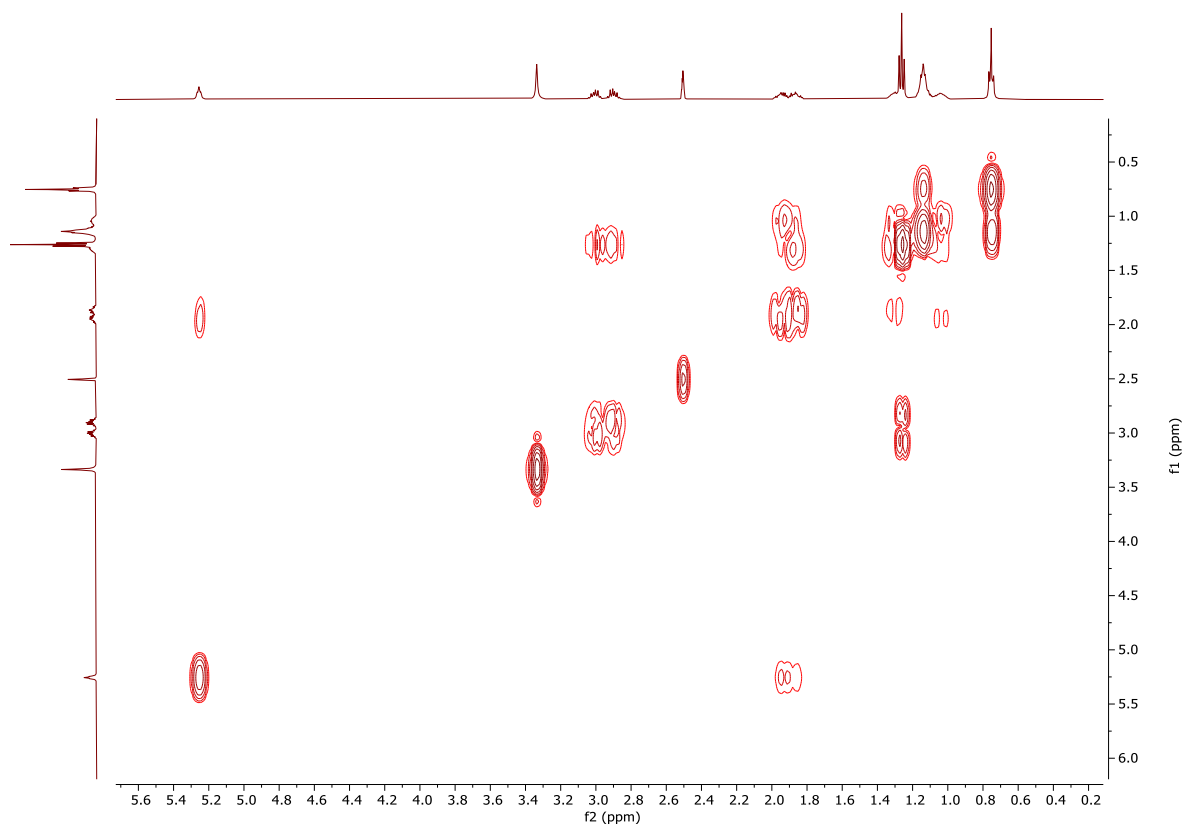

**Figure S8**  $^1\text{H}$ - $^1\text{H}$  COSY nuclear magnetic resonance spectrum of compound **2** (N-ethylheptedrone) – aliphatic fragment

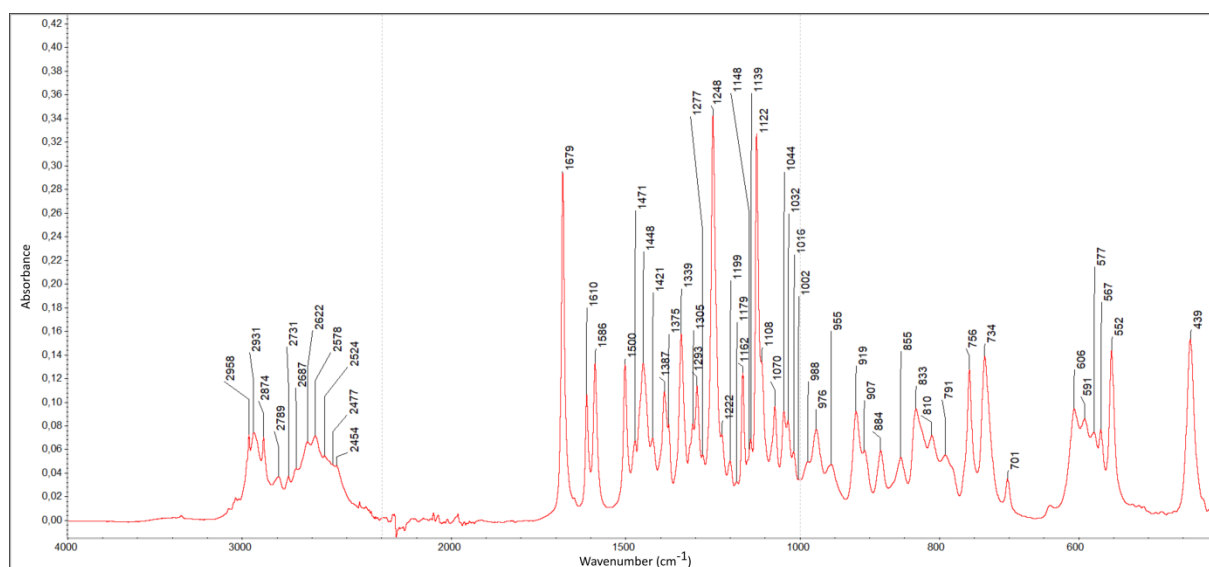

**Figure S9** IR spectrum of compound **1**

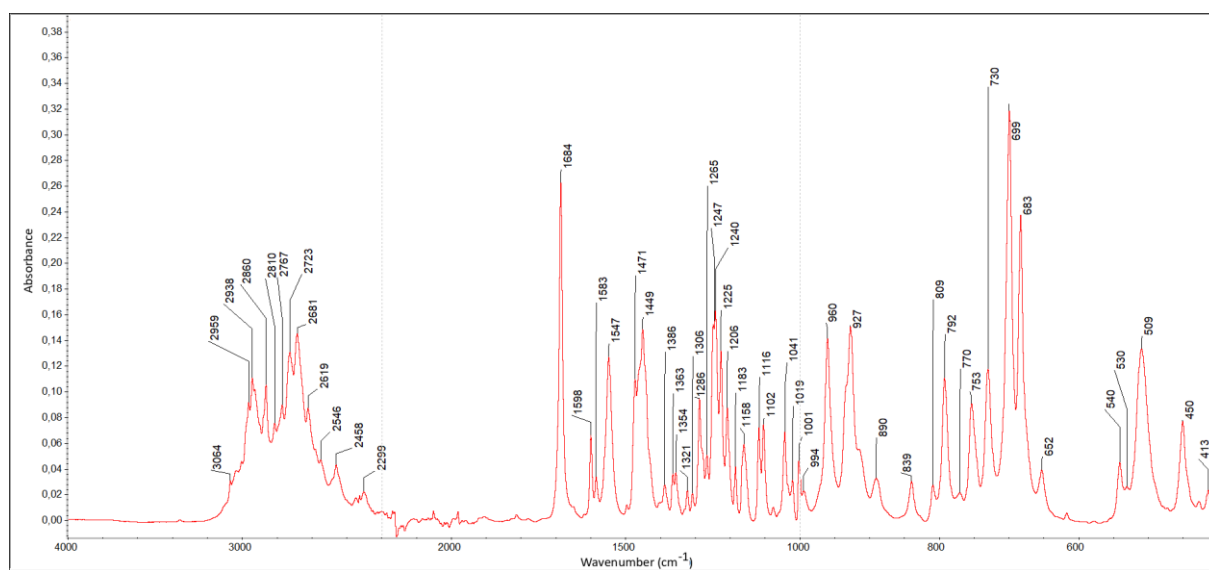

**Figure S10** IR spectrum of compound **2**

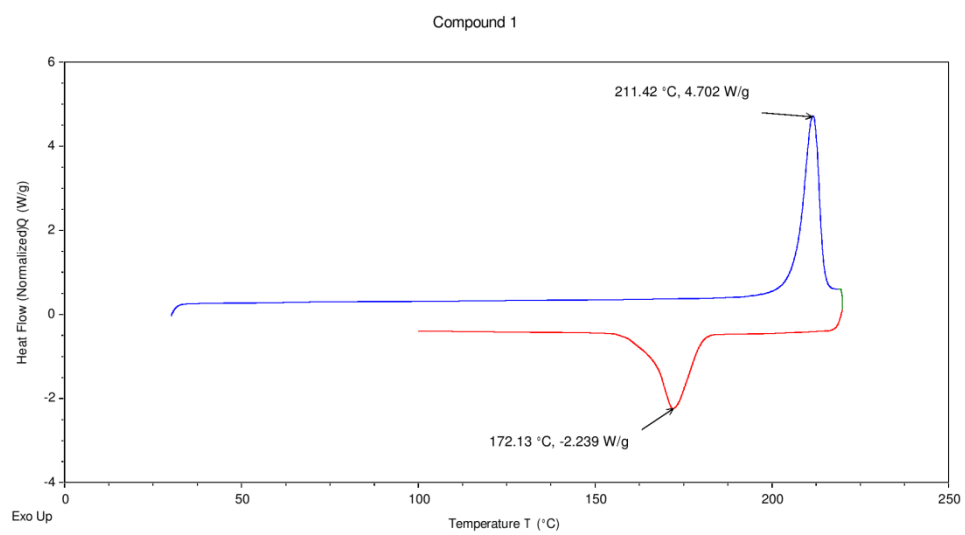

**Figure S11** DSC of compound **1**

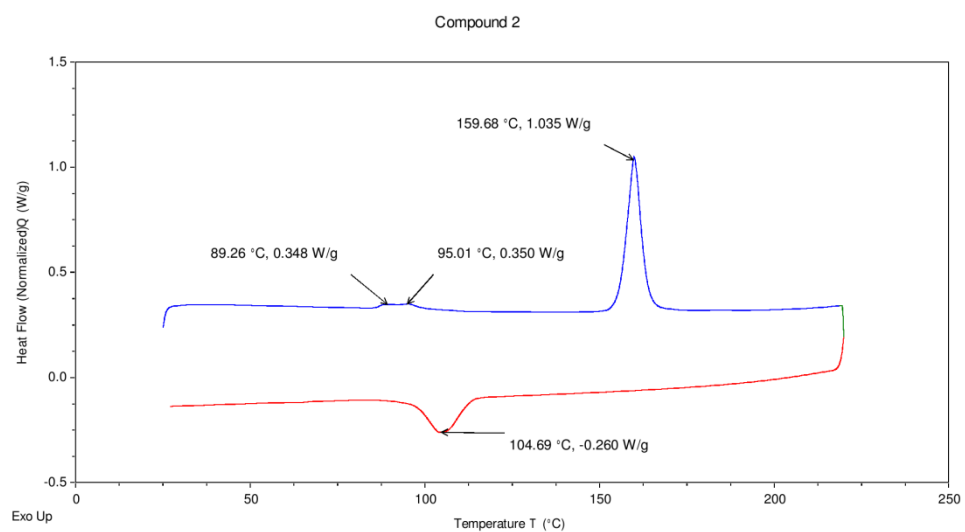

**Figure S12** DSC of compound 2

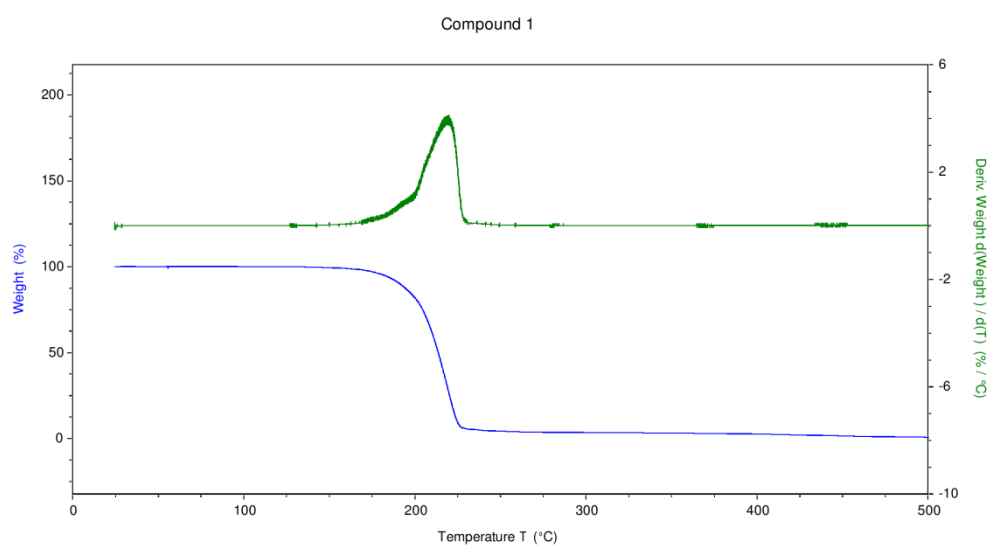

**Figure S13** TGA of compound **1**



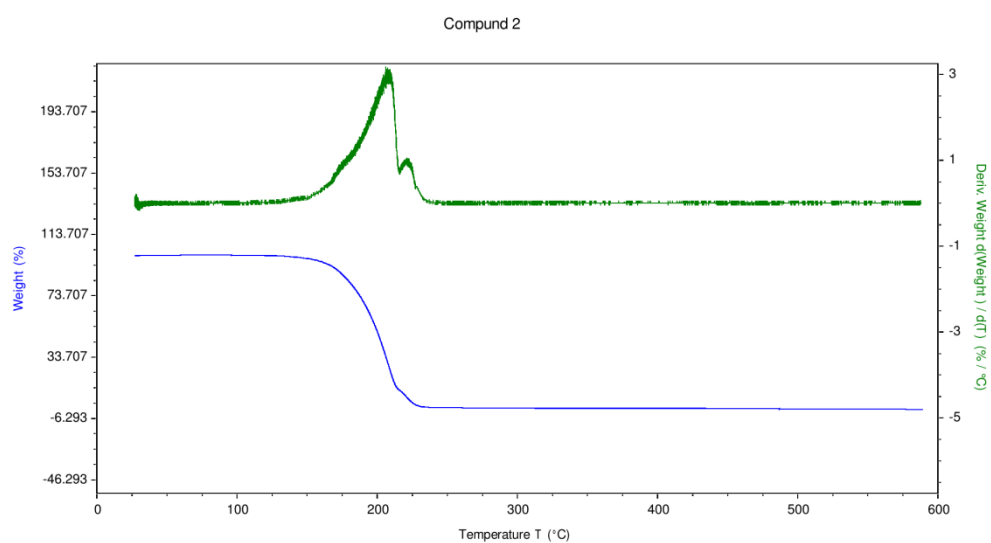

**Figure S14** TGA of compound **2**
